# Supplementary material for: A comprehensive map of the influenza A virus replication cycle
Source: PubMed Central journal article supplement (PMC3819658; doi:10.1186/1752-0509-7-97), 2013-10-02
Supplement: 1752-0509-7-97-S1.pdf [file 1752-0509-7-97-S1.pdf]

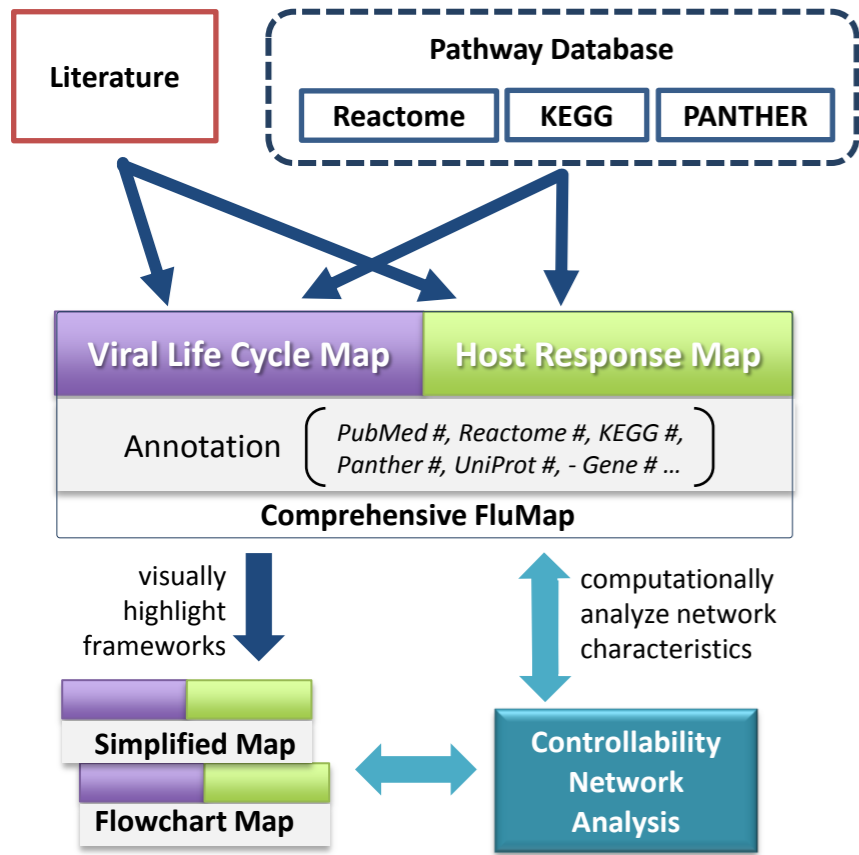

(a)

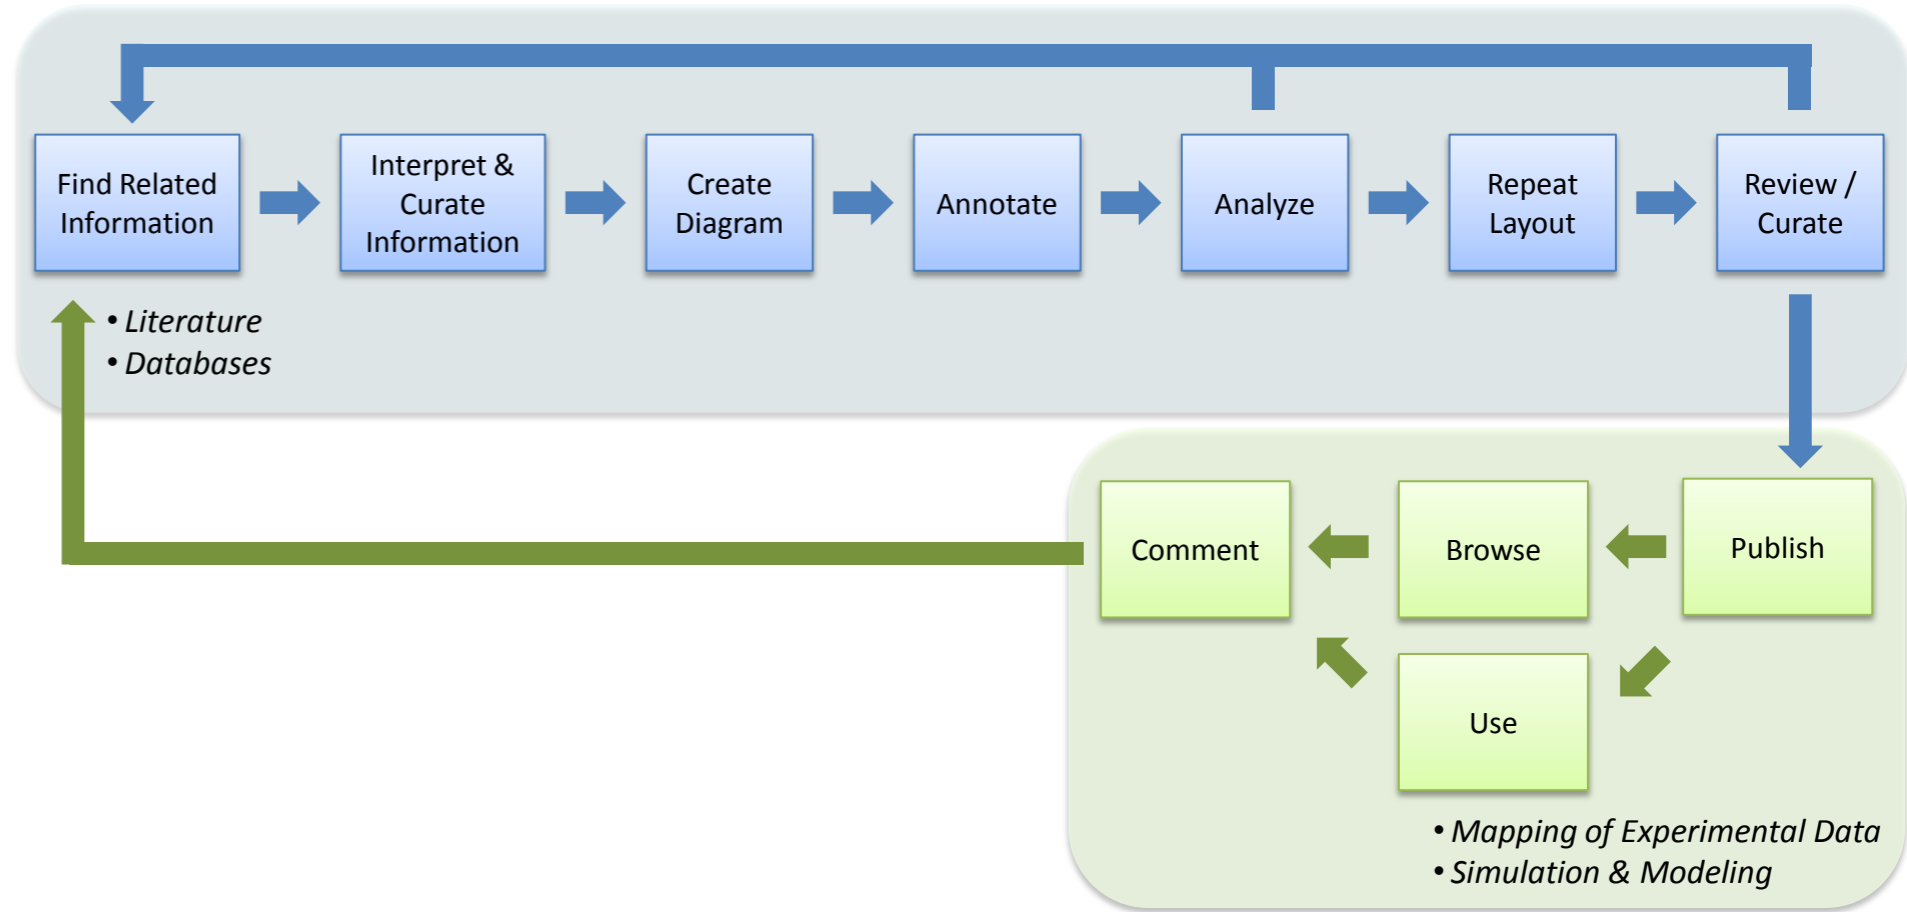

(b)
