# Supplementary material for: A comprehensive map of the influenza A virus replication cycle
Source: PubMed Central journal article supplement (PMC3819658; doi:10.1186/1752-0509-7-97), 2013-10-02

**Color Definition**

virus protein: purple  
host protein: white  
catalysis: blue  
inhibition: red

virus mRNA: purple  
host mRNA: green

**Legends**

**Reduced Notation**

negative influence: A -| B  
unknown negative influence: A -| B  
positive influence: A --| B  
unknown positive influence: A --| B  
reduced trigger: A -> B  
unknown reduced trigger: A -> B

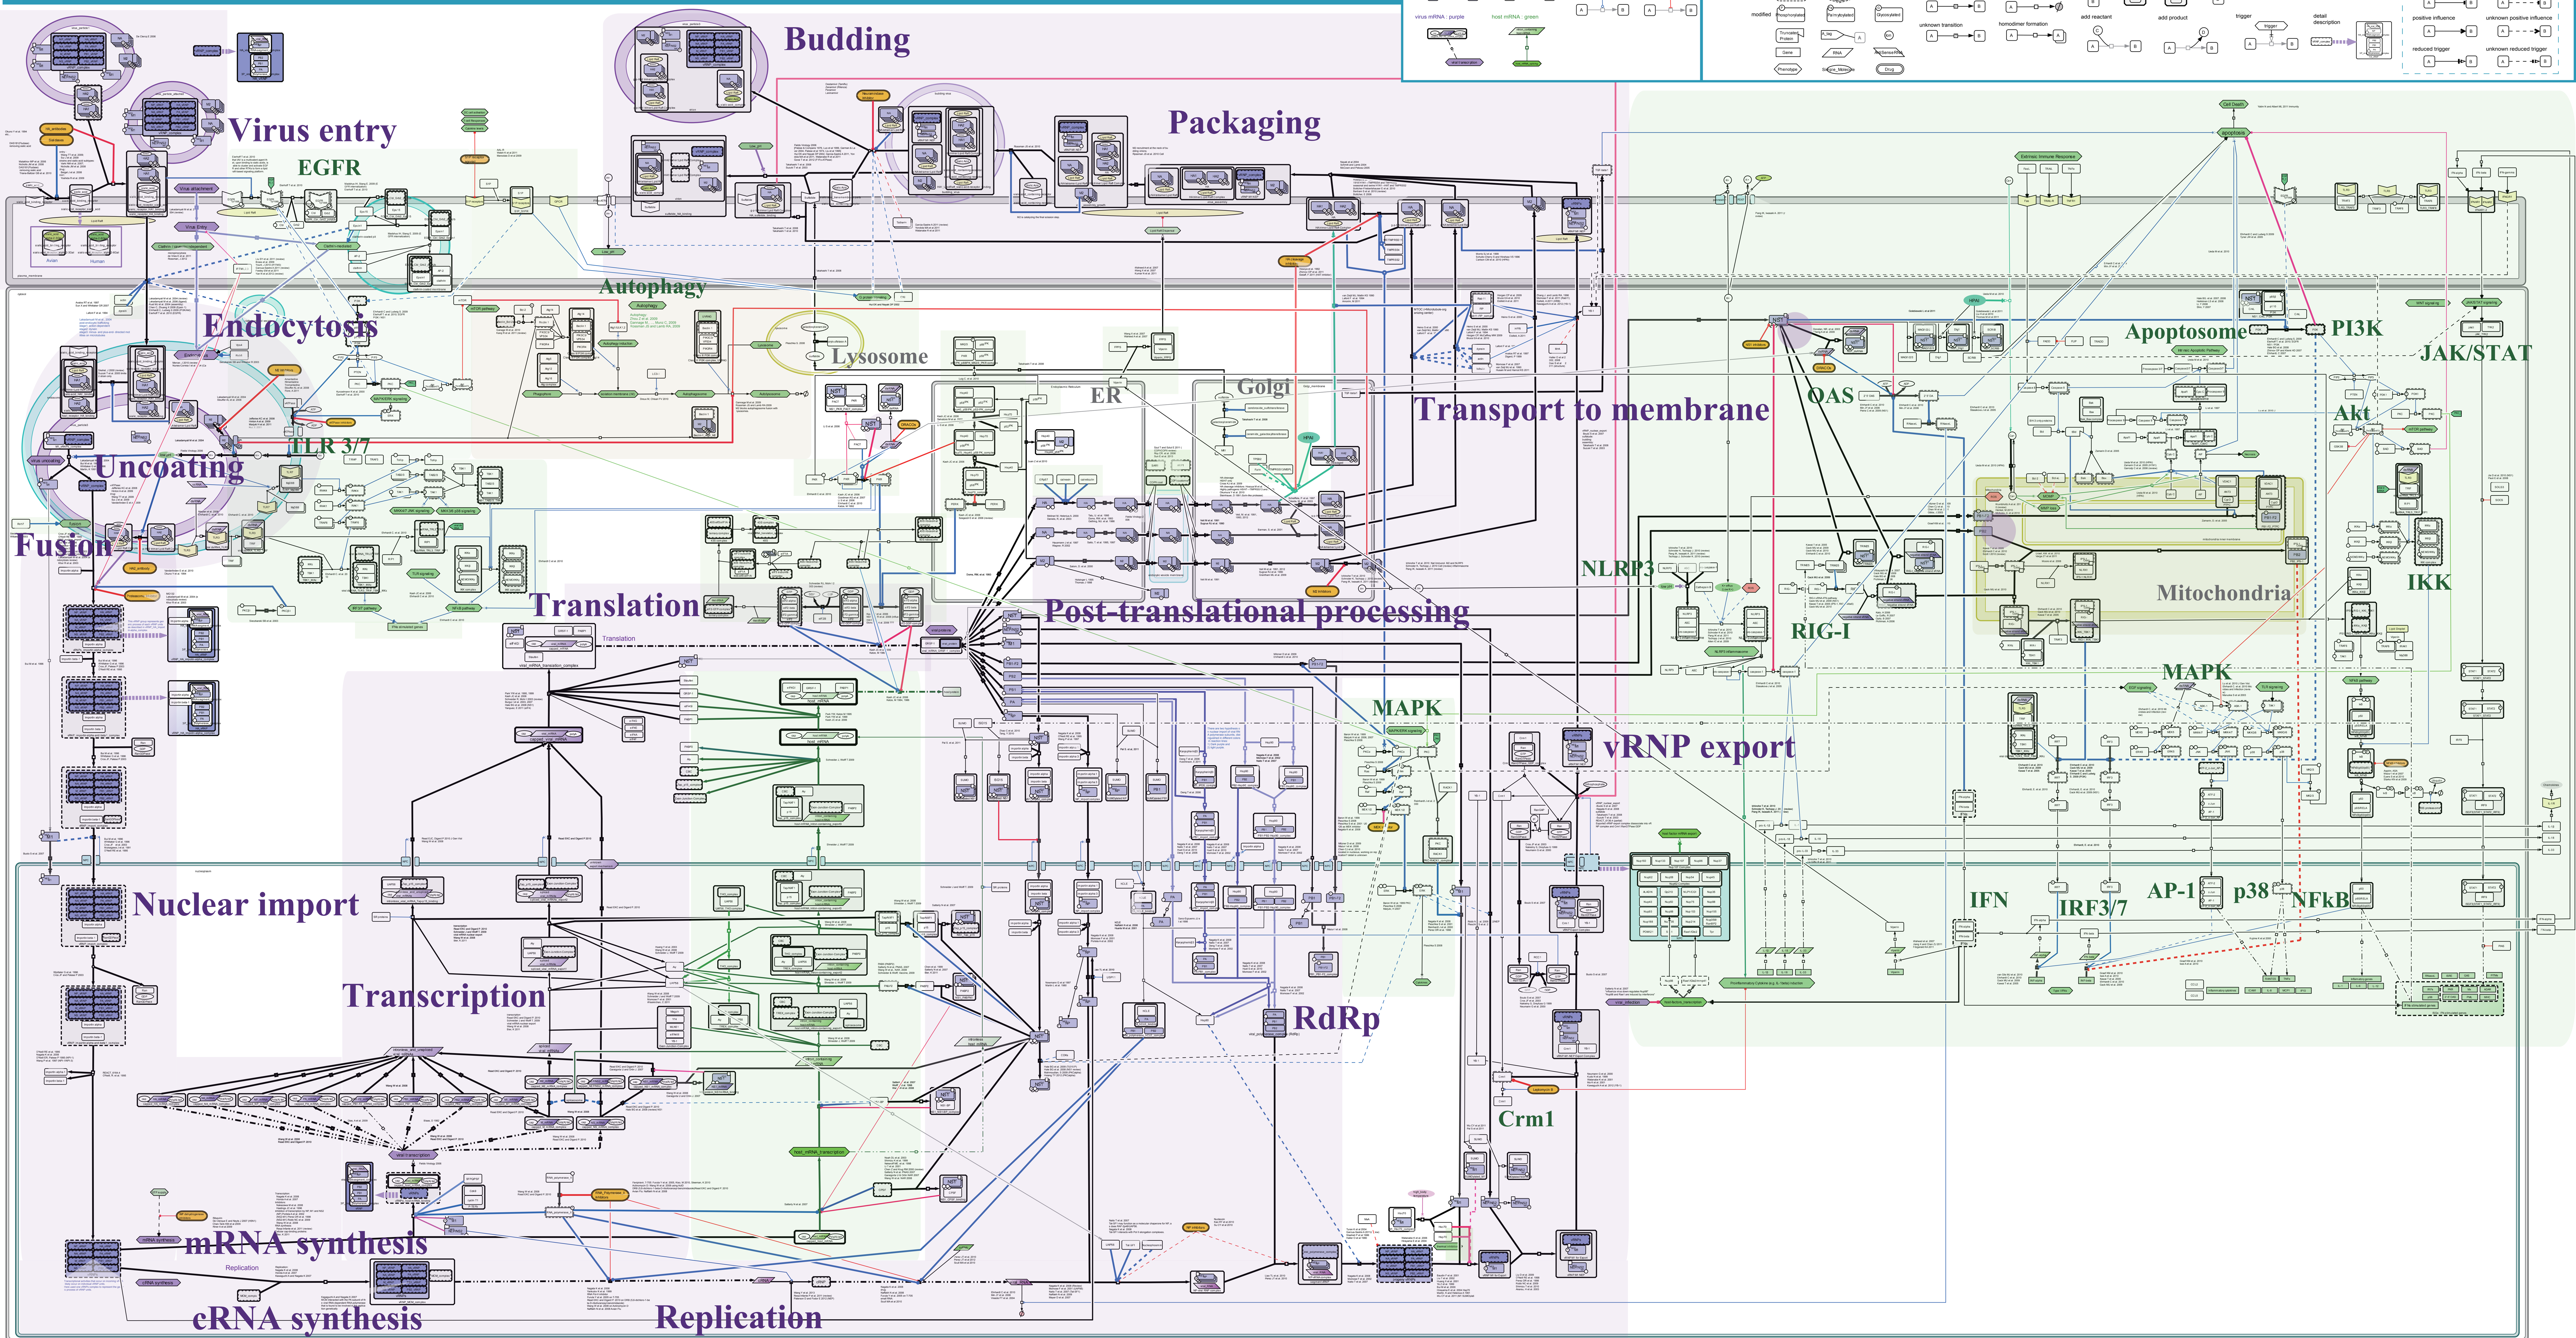

Supplement: 1752-0509-7-97-S3.pdf [file 1752-0509-7-97-S3.pdf]
